# Supplementary material for: Hierarchical and Dynamic Regulation of Defense-Responsive Specialized Metabolism by WRKY and MYB Transcription Factors
Source: PubMed Central journal article supplement (PMC7005594; doi:10.3389/fpls.2019.01775), 2020-01-31
Supplement: DataSheet_1.pdf [file DataSheet_1.pdf]

**W2, M2, W1, M1 promoter regions of CYP79B2**

Agttagaatcgaattaatccaaaaggaattattgtggaattaactaaagcaatccatacaaatc  
acaacaaaagctcgtcaagtatatataatcagaat**agtcaa (Wbox)** taatttagc**tttgaat (**  
**WRKY33)** gccgaact**ttgact (Wbox)** aaaactcagacatggtatagtagtaccaaaatatttgaat  
ttagggaatatcattgctaataacaataataaaaaagatcatagct**agattcaaa (WRKY33)** atg  
ttgaacatgacctacgacatt**gttgaat (WRKY33)** tcattgatctggctcttgctaaaaacttt  
aaaattgatgagttcaacatcttcaaagtcatgataacgggtccaacggaaa**ttgact (Wbox)**  
ttt ttttcatgctcctgatataataataatctaaagattacgggttccactaattgtcattac  
tcattaacattcctattttaaagttgtgatagtttttagggttttacgtagtcgtgtcatatagc  
gattaactacgtacttgtagatttatcaattacttctggttttacgagaacctaaaaaaaga  
agcagatgcctagtttatagagcacgt**gtactgtcttgaacttaggtagg (SMRE8/ACI)**  
**tggttaaggttaccaaagaccttaaaggaataaaagttactaattaacttaagtaaagttggt**  
**(SMRE2)** attgcttatataattgcaaagtattacaaccaatccctctgtatattggttttaac  
catagatttttttacaattaagtttatgatcaatcaatttttaccattttctattaaattatg  
taaaaagaaaaggatataatataatataatataatataatataatataatataatataatataat  
ttttattatccattctttgtggacatcgcccataatataaaaaaaaaaaactttcgtataac  
tgatttatattttttgtaaaaacttaaaggaagcctaagaaatatcttgtgatatttttgaca  
aatgtggtatatactttttataatataatataatataatataatataatataatataatataat  
cattttgctagcgatcaacaaaattaaataggcacatgtaactgatctcatacgccttgaaa  
tttaaatctttgtgtcgagagaccgatctttatgcaaattatgaaactacacatgggttatgca  
cggaagatcacattgcatgtataccatattataaaccaaaaatgatcaagaagaaggcgaaaac  
atgtgggtaaatttttaaatttcgatcatgcgatttttttagctcatcatcaacagacaagaaact  
atcttttgactgtaaataactaaatacaaaaataaaatcttcatcattttttgcatgtgtcaaat  
aaattacgcgaacttttttttttatcgactattaatagagaaacctgttttatttg**ccttgat**  
**ttggaaaaatggagaaa ttgact (Wbox)** taagacttagtctcggtcacatcggcaacaacgga  
gcttaaacggcgctccgcaacatggaaactcaagccacgaatctgatata**ttgact (Wbox)** ata  
gaagtagtaagtaact**ttgact (Wbox)** cgtccCacatcagtttcaatttccacgagggattt  
ggcagggtgaactctctacgtacccaaaacataatggctattttattttcataactgatatttagc  
aattaattattcgtccttttttaaccaattttctatagttgggaaataatcaatttttacactt  
tcaatgtatacgttacagatttttttttatttagtcatgcacataattttcaatttttacactttc  
aatgtaaacaatcgattcttaattgttaaaaataggtttacgtaaggaattaaagatttgttta  
aaatatgttccggccggtctaataatttacttgacgttaattttcttaaacacttttagatagga  
ggctttgtttatcccaaatgattttgtaccact**gcgacaatactagctagacataaaaatgttaa**  
**taattttttattaagtaataataatcgaagtattagatcaatgtagtagacaggttaggt (SMRE7**  
**/ACIII)** taactaaacaagagtaaacactttttttttcttttccaggataggtaaaacaaatt  
tcacactattttgctgattttccttaaatttgttggttcgttttctcagcaagatgaatattttg  
tttcatagtaattcacaagtataaactcgccagaactcctcaaacagtgaatatataatagct  
tttaactgtttttcggctggaccgggtttttaagtgcataataaacacgaggaattttggcagg  
tcaccaacaaaacttttaaaaatattaaaaattcccatcaagaatagaattaataacaatga  
tatcttaataatataatagatattttgaaacgtaggaataatcgtaataatggtcaacggtggg  
gtggtactcaagatggaccctccctccacattttctcactccttcgtaagtcctttccacgc  
ataagggtattatagtcattttcacataaactaacgactactagacttgtatataaataggaagg  
tgaagctctctctttatccatgcagagacaacagaaaccacaacaaaactttgagtcctcttc  
ttctctatacacaac**ATG (TSS of CYP79B2)**

**M2**, **W**, **M1W**, and **M1** promoter regions of *CYP79B3*

atataatttcaaatttacacattgtataacgatatgagatttacataaaatattttcatatatt  
tgttcatttttaagagttcacaccacggataaattatcgatataataggaagacttggctataac  
tacaaaaagctgaagggacatttattattatcccccaaaaaaagcaacatcatgttcgtattga  
ttattgaatatgacatattgttagagacgaatcatttatgaagataaaatcaaacgacctacc (**SMRE8/ACI**)  
aaaataagatataactcaaaagagatataatgtaagttcaatcagttaaagctacta  
ttatggctctgttagatatgagagtagtgctaagataaagagactacc aattcatattaccgag  
aaaaaaaaaactgtccttgttagtttagagtcacatatataaacacgagatttttggcaggtcac  
caacaaaataattttaaaatatattatgaatgaattattatacatgattattatcttttatgta  
cattttttgaaagttagccctacaaaattcaaa (**WRKY33**) atatggtgacactcctcactaga  
gaccaagttggt (**SMRE2**) ccaactctagctataccttccacactgcttccctccccaccacaa  
aaggggtactatcgtcatttcacacgtacctacc (**SMRE8/ACI**) tgtaattaatgtgacatta  
taataacaacgtgaaagaaggatccatgcagaacaattagcatatattacaaaacacatact  
aattgtttctccttctccttctccttctcctgaaATG (**TSS of CYP79B3**)

**M** and **MW** promoter region of *CYP82C2*

aggcctttgtccttgttactcacgacactgtcgttttgagtcttcgcttcgacttctccaaagg  
gatcttgaagctgtctggattcagatcttgaaggtgatgtcggagcagtgagggtcatgcta  
atcaacaaccaaac (**SMRE3**) ctgtaagcatatgagaagcttccaataaaacattcttaaaatt  
tattttcaacaactgccaatgtattaaaaaaaagcaatctcatgaattgcctacacgctaatta  
ggcgggcgaaatttgttttatgtgtatgtggatggattttgttttctcctcgccatcctttcct  
ggtaaaaccaataattttttatcacatataaagttacgtgctgaacgaaacaaccgattatt  
attaagaatccatgttgaaatagagaaaatggattgtgtgaatagaaaaacaaaaacgaaaagt  
cgacaaaaaaaaacaaaaacagaaaaaccactaaagtcaa (**Wbox**) gcgttttgtttcaacca  
tgttatagtttagaactttataatcagaaattaattccacgaaaatgaataaatgtcagcagtc  
aa (**Wbox**) accagaccattaaaagaaacaattaccattaaaagatataatgact (**Wbox**) aaca  
aatcaatacaaacctttgctccatctctgttatggacacagttgacaattacaaaaaccctc  
catcttctcgtctctctctatcatccatgacttttttttctcaacaacaactaattattatc  
caaagttcttagataatgagattaatacatgctatttcttgcccaactaggcacaatagaataa  
agcttaggatcataattcaaa (**WRKY33**) aatgaaagagactcccttgatactctgccaatgtg  
tgccctctcttggtatgaacacaaaacttgacc (**Wbox**) tcttcaaattgggggagcaacctctg  
cagatcatccatgacttaaaactgcacaataattaaaataggaaacttaagttcatcaagagaga  
caaaaaatatcaaaaactcttatttataaccatttctattggcaatatttaaatagttttttata  
attaaaataataaaaataaaagagaaaaaaagtaaaaaaattctcgcttgaatttttttgaaata  
ctctatacaactcatagtgacatttttttttcaattggttcaatttttttttactaaaaaaa  
aattttaattacttttttagaaattctttggggttctccttgatggaaaaagatataccaaaat  
aggtaaagattcttgaacaatgggtgtaccatctacgacttcaccgaagtgaagctaaagcatccc  
tttaacgttggtaatcagttacccatgacacacactggacatttaccttcatcactctggctcgt  
cctgagacttgaacagtttcttgtttctgttatcatttacaacataaggcccacttcttgcca  
cacacagtttattactcatcaatttctctaataactattactctataacaacaaaaaagtaac  
attgtaatttgtacacatagcgtttgatctagctagttctatatgtagaattgatgttagcaag  
tgaatcaaaattttgoggagatgatgtttgaacatgggtttgttcattgtgttaccacacgaa  
gccaatgttattgttcgtccagatccttgtaaaaagaacacatatggatcatttagtcgcaaca

ataaagaagatgtatcagagctacatatgtatgtttcacagtatttctcctctcgattaacaat  
gaactgggtgcaaggatcacccgattcgttcttgaggggaagatccttggaagcagatcgattta  
gaggcaaagagggctcaaagaaatcgttgatgaaatcgctcaaggctcgccttgaagggtcgc  
agtttcttactaatcgtgagccttttttaaagttgcagtaatcgttgatgaaacaagcgtgca  
cggtcatagtcatgctcgttttctcagaggcagcttgacaagagttaaattatgggtgatggataa  
ttagtgtatTTTTGAGGGCTGTCTCAACTGAACCTTCATTTAATGACTTGGCTAGCGATACAGAA  
CCGTCTAGCCACAAAAGAGAGATTATTAAGTGGAAATGGCGAGGCAAATGGTGGTAGTGTGTTT  
TGTCAAACGGAAATAGAAACAAGAGATCACCTATTTTTCTCTTGTTTCATACTCTCATGCTTGGT  
CAGCTCTTACTATGAAATATATGCTCGGCTCTCGCTTCACTGACTTGTGTGATTCTCTTGTTGC  
CCTATCTACGACCTTTCTCTCCACAACCTTCATTTGTTTGTGTTTAGATATGCTTTCAACTC  
ACTATACACAATCTATGGAAAGAATTAATGCCCATAACTCAGAGCTCCCACTTCTTTTTAAA  
TCTTGTTCTATTAAGTTTTCAAATTTTTCTCGGTTTTATGTTGAAT (WRKY33) TTATTGTA  
AACGTTTTTGAAT (WRKY33) TTTAACTCATACAAAAACAAAAAATATAATTAGTGTATTT  
AAATTATTTGTGTTTTAATATATTTTTTATTTTTATCTTTAAAACATGTTTTTTATTTGAGT  
TTATTATGAATTCAGTATTATAAGTTCATATCTTCATTTCAATTTTTTTTGAAT (WRKY33) A  
TAATGTTATATAATTTTTCTAAACACAAGTAGATAACGTTGGTCAA (Wbox) TATTTGGT (SMR  
E1) TAAGATAAATGGTGGAAAAATATTCAGAAATGTTCAAAAATGTTTCGACCATTTTTTTTATT  
TCAAAATGTACGTCACTAATCGATTTTTTTTGACC (Wbox) ATATACAATTTGCGACCCCC  
GCCTTTTCGACGACTTGTCTTTGGTCAA (Wbox) ACAGCAGTAAGATAGGCGTATGTCTCATGCT  
TACATGGTATTGAACCGATAATATGTGTGTGATATATAGAGAGACAGACTATACTTTTTAATC  
ATTCAA (WRKY33) ACTAGAAATCACCAAC (SMRE3) ACACATCTCTTTTGCACGCTCAAAC  
CACTATG (TSS of CYP82C2)

## M2 and M1 promoter regions of CYP83B1

aaacaaaggcttcaagaattctaccggaatcaATGGAGGTTCTGGTAGGT (SMRE8/ACI) TCT  
ACGTTTAGGGATCGTAGCAGCGTCACGACGCATGATCAGGCCGTACCGGCGTCTCTGTCTAGCC  
GGATTGGTTTTGAGGAGATGTGGTAGATCTCCTCCGCCGGAGAGTTCGTCGTCCGTTGGAGAAAC  
CAGCGAAAACGAGGAAGATGAAGACGACGCCGTTTTCGTCATCACAAGGAAGATGGCTCAATTCG  
TTTAGTTCATCTTTGGAAGATTCTCTTCCGATTAAgtacgtttctttattaattatcttcta  
tattctgttatctacacctgaatatattcgatcgatttattttattacaagaataaagtaaatc  
attagattctcttatgttcttgggtttgattttattgatgaatctgtaagatggtgaaattggt  
tcttacttatttagattctcagtttaaattgattactacatggtgtgtttttggttagtcatgt  
ggtttaggttttggtttttgttacagGAGAGGATTATCAAACCATTACATAGGGAAATCGAAAT  
CGTTTGGGAATTTAATGGAAGCGAGTAACACAAACGATTTGGT (SMRE1) GAAAGTGGAGAGTC  
CATTGAACAAGAGAAGAAGATTGCTTATTGCTAATAAGCTAAGAAGAAGATCGTCCTTGTCTTC  
TTTCAGCATCTACTACTAAAATTAACCCTAATTCTATGCCGTTGCTTGCATTGCAAGAATCTGAC  
AACGAGGATCATAAACTCAATGATGATGATGATGATGATGATAGTAGCAGTGATGATAA  
GTAAGCTGAAAGAGAAGAGGATGAAGATGACGAACCATAGAGATTTTTATGGTTCCTCAGACTAA  
GAGCTGTTTTAGCTTAAGTATTTCAAGATGATGATGATCGATGATc gat gat cattcttctt  
ctttgtccaagagtagataaagtttcgttgacaataagttggaggaagatttgacagaaacc  
aatttacgtgtaattgtaataaattaattgactgtttgtatattttgaattttctcaacgaag  
tagactttttattttttttgtcacacttctgtcaaccttaacatttgtagtaagcccatgag  
attggttctataaattttaatgtccgcatgagaacaaagtcgtaaatattgacggcttagtaat  
ttcaatagcggctgcaagtcfaataggacatctttaggctcgttctccgaaatactctttttt

tttttctctaccgagttgaatattatgtacgattcatcttagattgacgaagtagaatatttgt  
ctcactgtg**acctact (SMRE6)** gttcaactgcaaaaatatgaacatatttttctacaaaaatt  
gactacagagtaattagaaaacttaaaaactgagagtttagtttttggttacgtatacttttt  
ttttctttcagtttacgttatagcataggagaaaatgatcgcttcaaatttcataggtattttt  
aggaatttttctaaagtaccattttttatgctttgtttttaaatcgatcatatcagttcaaaaa  
gaaaaaatcaagaatgatgtctaaatgaacaaaagtttatgagatttataaaaaacaagttga  
tgatattttattacttcataatatacttactgttctatagttatatttttagaaaacaaaaccaa  
gaggttatatttcttatccaatatcttcacattttcaactcttcatcgatctcgctttcagttatt  
attgtgtaacccaagttacattttttaattccaaaaaccagtagtcc**acctact (SMRE6)** aac  
atcacgttttaaaaaacaagggaaaattc**tgtcacctgtcaaaaaatccaaaacaaaccaacc (S**  
**MRE4/ACII)** aataaaactttttgcttctgctatataaaccacatcatcattcaagtagaaaag  
tatccgaacacaaagacttaagta**agtc**aaacagaaaaaa**ATG (TTS of CYP83B1)**

**M4, M3, M2 and M1 promoter regions of SUR1**

TTCTTATCAAGAGTGTTCCTTATCTAGACTTGCAAAATCAATCAAATCTTGAGGAGAACAG  
AGTGTATCATCACGTCCATCAAGAAGCCTTATAACTCGTATGAGTTCACACACAATGGCCA  
CCACACATCTTACAAAACACACATAAGAAAAACAAAAGGAGTTAAAAAAGTGAAGAAAATATT  
TCAATATCATATCTTATCTATATTACAATTAGAGTAGTTGTATTGTAAACTTTTCAATATTGTT  
TTAAAGATTCTCATATGTACTTCATATATATGTCTCTTTATATTGCAGCATATAATAATCTTTT  
CTCTACAAAATATTCATTCATATGTCCATTCTTTTTTCTCTTGCAACTTAACTGTGTTCTTTCT  
GATCTCTTAAAGCTTTCATTATTATCCTTCAATC**AGCTTTTCAGTAAATCTGGGATTTTGAAATA**  
**AAACTACAAGAACAATAATAAATTGTTAGACCAAAC (SMRE3)** TTGTTTCATAGAGAAAAAAA  
AAGAATCTGATACACTT**ACCTAAC (SMRE7/ACII)** ATGTTGACCAAGATGCAAATGTAGATT  
ATTTAATCGTCCTCCCAGCTCTCAAAAAAAACCCATATCTTTAGCAATTTCTTTCAAAACATG  
**GAGAATATTTTTTCGAGCATCACTTATACCAAAC (SMRE4/ACII)** AGTGATTCAAGAAGCTGG  
**TGTAGTTCAAAAAGTATAGCCCTCACTCGTCGACGAACTTTAAATGAAAGTAATGAAAATCTGG**  
TATTAACCTGAAACTTTCACACTTCTCTTCCACTTTTATCCTTTCACACTAGAAAATTACAATG  
TGCACAATTATAGCCGTTTCACACTTCTCTTCTACAATTTTTTTTTTTCACATCAAAAAATTATT  
TCAGGTTTTTGACACATATTCCCAACAATTTATTTTTCTTAATAATTAATAATTTTTTAAAT  
ATATCAATGTACAAAACATAGGCTCCAAATGGATGACAAATAATTGAATATTTGGGTGCAAATG  
GTTGCACAATTTAAAAGGTTGAAGAGGTTAAAAACATTATTCAATTAATCTTCAGCATTTTAGT  
TGAAAAAGTTGAAAAAATTATTCAATTCATTCAACTTAAAAAGTTGAAAAATGAACAAATTATA  
AAGGAAAAGTGTCAACTTCTTGATCCACATTTTTGGAGATGATCATTCAACCCCAATTTTGT  
CA**ACCTAAT (SMRE5)** AATTTCAACTCATTCAATTTTTGAAAACCATTTGTACAAGTTGAAGAT  
CTTTCAACTTATTCCTCTACAAAAGGTTAAACAATTTTTCTTTATAACTTTTTTGGTTGAATG  
GATGAAATTAGTCTTAGTTATTTATCTCAAATAGTAAAAACATAAGATGAATGATCATTTAAC  
TTTTTATAACCTCTTATTTTTCAAACAACATTTGCACCCATAGTCTAAAAATAGAAATTTGTTGA  
CCAAGAAGA**ATTTGGT (SMRE1)** ATCAAATGAATATTTTTTGTGGCTCAAACTTTTATTCTCTC  
TTAAGTAGCTGAAAAATTAACGTTGGAAAGTGGGGTCTACAGACCTTTACGCCATTTATTTA  
CGCTACAATGGTTTTCTAATCACATCCTTAATCTTACAATTTGTTTGATAATAAATCTACTAAT  
TAAATTTGACGTCACAAATCACAATG**CACTGACGCCATTAGCATGTTAGTGACAATGTAACCA**  
**AAC (SMRE3)** TGATTCATCACATTTCAAACCTGAACCTATTCCGTTGACTAATCGGTTGGGTTT  
**TAACCTCGCCAACTATTCTTATCA**GGCCAGGCCAAACATT**CCTTCACAAAGCCCTGCCAATTTG**  
**ATTAATTTTTGTGGCACGTGATTTTAGTTTTGTGTTAGGT (SMRE7/ACII)** CTCACCAAGAT

TATTGATCACGTTCCATAATTCAAACCTTGCATTATATACCAAAAATCCAATCCGTATTGAAA  
CTTCATTTGTAAAGTTTTTTTTTTTCCCAAATAGTACTTTTTTTTTTGTGGCCTTCTTATAGA  
AAGAAGAACTCAAAGCACAGAGAGAAGATG(TTS of SUR1)

**W promoter region of MYB51**

GattatTTTTTagtatttTgtactaaagaactactgtaatttagttgtcatacttttagcatgaa  
tcattgaatttagagttgggttgatgtaaaccaagctggtagctttcttcataaccgtatgta  
ctttcatatcatattagagagaaaaaaacacaatg**ttgact (Wbox)** aattaatgggttctg  
tctaactagaaaagtggaaattagttgtacgaaaaagaaaatagcttatctctttctttgtac  
cttagatTTTTccttggataatggatatcgatagtccaagtcagtgtttgagtgaccaagt  
tgttgctttaatttaattctagttcaaatcgcactacttttTgtggtgtacctctctaccttacct  
tcctcgaattttcaattcgtgtgctagtttgccaattgtttctttataattttTgtcgtctctat  
gattgtttaagcatatttaaatatttgagagaaaaaaataactaagagttcagtcgtatTTTgaa  
aagtcctcgcactccaagttttaaag**gttgaat (WRKY33)** tcattctgtcatggaaacgtacct  
ttgtgggtTTTTcatttTcgatagacattTTTTtaactcttctgataa**attcaaa (WRKY33)** atgt  
TTTTTtacattggTTaaattTgttgccaattTcaataaagctTTTTTTttactcgttataaaa  
tTaaaaactTgctgagaaatttatagtttcatatatactttggaccgac**ggTcaa (Wbox)** tacc  
aaaaactaaaataaaattTT**ggTcaa (Wbox)** gaatc**ggTcaa (Wbox)** taaaaatatctc  
caaagatcgaagagaaagttcaacaggattTTaatttaattTggtgttccggacctgcccggcgcc  
gtattataattcttcaataaattttatattttTggattgcataatcaaaactattTgcatagcag  
acatagattTcaaaataaattgatacgtatttagctattTacataggcaagacaattttacggt  
acataattTgcatgcttgatattcattctTTTTTTTTtagcaacctTtgctatattcattctatt  
TTTTccctTTTTTgctactatcaatatcatatcagatgtggcggttcttatgcatgggatta  
tgaaaaatgatattatataatagatgtcttcgtagtattTTTTttattgacaatcaaaataaaat  
aaattagTTtaagaaagatcaaaagtctagtgtcaaaatgtccactgacaaaagtttagcagttt  
ttctTTTTatgtaataatccgattataaaaaattTgcgttaaggaatcataatgagccatgtgtca  
gtcatattTaaacgacgacggtTggcagcagccacacgtacagcctcaggcaagcataaatagag  
atgggctctttcctataagtttcccactTtgcaaagtgtaacacaaacagttctcttttagagaa  
aaaaagattctctctataaaaccttctctttTgtgtctctctttTgtggtaagaaaacagagcaac  
tagatctctcttctcctctgctcgttcaatgttataacgatctcagagtatcacaaaagaacaag  
atgtctattcgaagaatctaccgatgtctgaattcttTaatcaaaagatctTgtgctcaatctc  
tatgatcatacgccttTcacactTgtTtcacctctcagttTTTTTTTTTgtgTTTTTTTg  
tccctctTgtTtTcactTgagaacaacccccctTtgaactcgatcaagaaagctaaagttTgaaga  
atcaaga**ATG(TTS of MYB51)**

**Data sheet 1.** Promoter regions amplified in CHIP-PCR experiments.
