# Supplementary material for: Hierarchical and Dynamic Regulation of Defense-Responsive Specialized Metabolism by WRKY and MYB Transcription Factors
Source: Front Plant Sci. 2020 Jan 31;10:1775. doi: 10.3389/fpls.2019.01775 (PMC7005594; doi:10.3389/fpls.2019.01775)
Supplement: Supplementary file 10 [file Table_1.xlsx]

## Sheet: Sheet1
Supplemental Table 1. Published transcriptional responses to PTI elicitors (Denoux et al., 2008) and ETI elicitors (Toufighi et al., 2005; Austin et al., 2016). Red-yellow-green scale indicates fold change magnitude. Blue indicates P values less than 0.05.
	details	Denoux et al., 2008 flg22 1h	Denoux et al., 2008 flg22 3h	AtGen_B-34_3-6-1_REP3_ATH1_Elicitor-Flg22-1 [ATGE_ExpID_122] Response to bacterial and oomycete derived elicitors leaf No 1	AtGen_B-41_3-6-4_REP3_ATH1_Elicitor-Flg22-4 [ATGE_ExpID_122] Response to bacterial and oomycete derived elicitors leaf No 4	AtGen_A-41_30-1_REP1_ATH1_Psy-phaseo-02 [ATGE_ExpID_120] Response to virulent, avirulent, typeIII-secretion system deficient and nonhost bacteria leaf No 2	AtGen_A-45_31-1_REP1_ATH1_Psy-phaseo-06 [ATGE_ExpID_120] Response to virulent, avirulent, typeIII-secretion system deficient and nonhost bacteria leaf No 6	AtGen_A-50_32-2_REP2_ATH1_Psy-phaseo-24 [ATGE_ExpID_120] Response to virulent, avirulent, typeIII-secretion system deficient and nonhost bacteria leaf No 24	AtGen_A-19_24-3_REP3_ATH1_Psy-tomato_avrRpm1-02 [ATGE_ExpID_120] Response to virulent, avirulent, typeIII-secretion system deficient and nonhost bacteria leaf No 2	AtGen_A-24_25-4_REP3_ATH1_Psy-tomato_avrRpm1-06 [ATGE_ExpID_120] Response to virulent, avirulent, typeIII-secretion system deficient and nonhost bacteria leaf No 6	AtGen_A-25_26-1_REP1_ATH1_Psy-tomato_avrRpm1-24 [ATGE_ExpID_120] Response to virulent, avirulent, typeIII-secretion system deficient and nonhost bacteria leaf No 24	2530_Psy-ES4326-04 [ATGE_ExpID_168] Pseudomonas half leaf injection leaf No 4	2529_Psy-ES4326-08 [ATGE_ExpID_168] Pseudomonas half leaf injection leaf No 8	2791_Psy-ES4326-16 [ATGE_ExpID_168] Pseudomonas half leaf injection leaf No 16	2788_Psy-ES4326-24 [ATGE_ExpID_168] Pseudomonas half leaf injection leaf No 24	2525_Psy-ES4326-48 [ATGE_ExpID_168] Pseudomonas half leaf injection leaf No 48	2796_Psy-ES4326avrRpt2-04 [ATGE_ExpID_168] Pseudomonas half leaf injection leaf No 4	2793_Psy-ES4326avrRpt2-08 [ATGE_ExpID_168] Pseudomonas half leaf injection leaf No 8	2508_Psy-ES4326avrRpt2-16 [ATGE_ExpID_168] Pseudomonas half leaf injection leaf No 16	2509_Psy-ES4326avrRpt2-24 [ATGE_ExpID_168] Pseudomonas half leaf injection leaf No 24	2784_Psy-ES4326avrRpt2-48 [ATGE_ExpID_168] Pseudomonas half leaf injection leaf No 48
	tissue	seedling	seedling	leaf	leaf	leaf	leaf	leaf	leaf	leaf	leaf	leaf	leaf	leaf	leaf	leaf	leaf	leaf	leaf	leaf	leaf
	treatment	Flg22	Flg22	flg22	flg22	Psy phaseo	Psy phaseo	Psy phaseo	Psy avrRpm1	Psy avrRpm1	Psy avrRpm1	Psm	Psm	Psm	Psm	Psm	Psm avrRpt2	Psm avrRpt2	Psm avrRpt2	Psm avrRpt2	Psm avrRpt2
	time point (hr)	1	3	1	4	2	6	24	2	6	24	4	8	16	24	48	4	8	16	24	48
MYB34	Fold Change	-3.476	-5.446	0.654973	0.631681	1.02765	0.477312	0.357551	0.541468	2.59206	0.733264	1.07845	0.852917	0.707944	0.734622	0.632255	0.793239	0.773564	0.49715	0.67045	0.736677
	P-value	8e-05	2.34e-08	0.105511	0.0709881	0.954264	0.0478682	0.00211221	0.204229	0.0586568	0.396504	0.880624	0.829352	0.0745996	0.53384	0.209891	0.7013	0.382702	0.104389	0.0454033	0.281076
MYB51	Fold Change	47.1409	23.8308	2.04692	1.8147	2.31287	4.72981	1.58468	3.10317	1.32759	1.38902	0.692418	1.26021	1.94502	2.66835	1.81109	1.79118	1.34405	1.12047	0.851887	0.930909
	P-value	1.21e-28	8.92e-33	0.0611308	0.101311	0.0060054	0.00775587	0.000137979	0.0955139	0.508254	0.209321	0.102883	0.139482	0.110643	0.0363638	0.463533	0.188766	0.0614599	0.00633511	0.132054	0.272198
MYB122	Fold Change	3.23323	13.76	0.243386	2.21569	4.77143	1.89841	7.78	8.08571	4.71746	36.22	2.16576	6.50877	1.46429	0.955442	0.49235	0.341463	0.199012	1.19106	0.246177	0.789123
	P-value	0.15382	8.3e-10	0.346311	0.317114	0.17471	0.557149	0.154931	0.389408	0.00760971	0.0262389	0.000902098	0.0197695	0.621874	0.941553	0.223462	0.0516899	0.307162	0.642336	0.17207	0.0997289
WRKY33	Fold Change	23.453	11.841	2.82124	2.74756	2.19263	3.27951	2.3101	2.19165	2.7188	3.28236	1.18683	1.18168	1.99746	2.54292	1.74665	1.2071	0.937653	0.768008	0.836105	1.02458
	P-value	1.03e-27	4.81e-18	0.000706748	0.00655808	0.00114146	0.00949111	0.0067449	0.00337224	0.00820789	0.0225541	0.231781	0.00610072	0.131724	0.00644129	0.444025	0.0738124	0.0569519	0.0761222	0.0286345	0.268412
																						0.05
