# Supplementary material for: Hierarchical and Dynamic Regulation of Defense-Responsive Specialized Metabolism by WRKY and MYB Transcription Factors
Source: Front Plant Sci. 2020 Jan 31;10:1775. doi: 10.3389/fpls.2019.01775 (PMC7005594; doi:10.3389/fpls.2019.01775)
Supplement: Supplementary file 11 [file Table_2.xlsx]

## Sheet: Supplementary Table 2
Supplementary Table 2. LC gradients used in this study.
Glucosinolates
retention (min)	flow (mL/min)	%A (H2O)	%B (90% acetonitrile)
0	0.5	98	2
1	0.5	98	2
6	0.5	94	6
8	0.5	92	8
16	0.5	77	23
20	0.5	69	31
28	0.5	0	100
33	0.5	0	100
34	0.5	98	2
44	0.5	98	2
Camalexin/ICN/4OH-ICN
retention (min)	flow (mL/min)	%A (0.005% [v/v] formic acid)	%B (methanol + 0.005% [v/v] formic acid)	%C (90% acetonitrile + 0.005% [v/v] formic acid)
0	0.5	65	15	20
5	0.5	60	20	20
10	0.5	54.3	25.7	20
13	0.5	53.1	26.9	20
13.5	0.5	52.5	27.5	20
16	0.5	52.5	27.5	20
16	0.5	0	80	20
21	0.5	0	80	20
21.5	0.5	65	15	20
26.5	0.5	65	15	20
