# Supplementary material for: Hierarchical and Dynamic Regulation of Defense-Responsive Specialized Metabolism by WRKY and MYB Transcription Factors
Source: Front Plant Sci. 2020 Jan 31;10:1775. doi: 10.3389/fpls.2019.01775 (PMC7005594; doi:10.3389/fpls.2019.01775)
Supplement: Supplementary file 12 [file Table_3.xlsx]

## Sheet: Sheet1
Supplemental Table 3. qPCR and ChIP-PCR primer sequences and efficiencies.
type	TAIR ID	primers	sequence	alias	approximate upstream location (bp)
ChIP-PCR	AT4G31500	83B1pr1F	atggaggttctggtaggtt	M2	-1900
ChIP-PCR	AT4G31500	83B1pr1R	acggacgacgaactctc	M2	-1900
ChIP-PCR	AT4G31500	83B1pr2F	tgtcacctgtcaaaaaatcca	M1	-100
ChIP-PCR	AT4G31500	83B1pr2R	tacttaagtctttgtgttcgg	M1	-100
ChIP-PCR	AT2G20610	SUR1pr4F	agctttcagtaaatctggga	M4	-1500
ChIP-PCR	AT2G20610	SUR1pr4R	tctacatttgcatcttggtc	M4	-1500
ChIP-PCR	AT2G20610	SUR1pr3F	atcgtcctcccagctc	M3	-1300
ChIP-PCR	AT2G20610	SUR1pr3R	actttttgaactacaccagc	M3	-1300
ChIP-PCR	AT2G20610	SUR1pr2F	cactgacgcccattagc	M2	-300
ChIP-PCR	AT2G20610	SUR1pr2R	tgataagaatagttggcgag	M2	-300
ChIP-PCR	AT2G20610	SUR1pr1F	ccttcacaaagccctgc	M1	-200
ChIP-PCR	AT2G20610	SUR1pr1R	aagttttgaattatggaacgtg	M1	-200
ChIP-PCR	AT4G39950	79B2pr1F	agattcaaaatgttgaacatgac	W2	-2300
ChIP-PCR	AT4G39950	79B2pr1R	aaaagtcaatttccgttggac	W2	-2300
ChIP-PCR	AT4G39950	79B2pr3F	gtactgtcttgaaaacttagg	M2	-2000
ChIP-PCR	AT4G39950	79B2pr3R	gattggtttgtaatactttgca	M2	-2000
ChIP-PCR	AT4G39950	79B2pr2F	ccttgatttggaaaaatggag	W1	-1200
ChIP-PCR	AT4G39950	79B2pr2R	ctgatgtgggacgagtc	W1	-1200
ChIP-PCR	AT4G39950	79B2pr4F	gcgacaatactagctagac	M1	-600
ChIP-PCR	AT4G39950	79B2pr4R	ggaaatacgcaaaatagtgtg	1M	-600
ChIP-PCR	AT2G22330	79B3p2F	tatgaagataaatcaaacgacc	M2	-500
ChIP-PCR	AT2G22330	79B3p2R	ggtagtctctttatcttagc	M2	-500
ChIP-PCR	AT2G22330	79B3pr1F	gatttttggcaggtcacca	W	-300
ChIP-PCR	AT2G22330	79B3pr1R	aacttggtctctagtgagg	W	-300
ChIP-PCR	AT2G22330	79B3p4F	gtacattttttgaaagttagcc	M1W	-250
ChIP-PCR	AT2G22330	79B3p4R	ggaagcagtgtggaagg	M1W	-250
ChIP-PCR	AT2G22330	79B3p3F	catttcacacgtacctacc	M1	-100
ChIP-PCR	AT2G22330	79B3GW1R (gateway sequence in upper case)	GGGGACCACTTTGTACAAGAAAGCTGGGTgcaaggaagaaggagaag	M1	-100
ChIP-PCR	AT4G31970	82C2pr9F	gttttgagtcttcgtttcga	M	-3000
ChIP-PCR	AT4G31970	82C2pr9R	attggaagcttctcatatgc	M	-3000
ChIP-PCR	AT4G31970	82C2pr8F	taggcgtatgtctcatgc	MW	-100
ChIP-PCR	AT4G31970	82C2pr8R	cgtgcaaaagagatgtgtg	MW	-100
ChIP-PCR	AT1G18570	MYB51pr2F	attcattctgtcatggaaacg	W	-1150
ChIP-PCR	AT1G18570	MYB51pr2R	aaaaaagctttattgaaattggca	W	-1150
type	TAIR ID	primers	sequence	efficiency
qPCR	AT3G13920	EIF4AF	TCTGCACCAGAAGGCACA	100
qPCR	AT3G13920	EIF4A2R	TCATAGGATGTGAAGAACTC	100
qPCR	AT5G60890	MYB34_1F	ATGGTGAGGACACCATGTT	85.9
qPCR	AT5G60890	MYB34_1R	ACATCTCTTCAATCCAGCTT	85.9
qPCR	AT1G18570	513F	ACAAATGGTCTGCTATAGCT	73.1
qPCR	AT1G18570	512R	CTTGTGTGTAACTGGATCAA	73.1
qPCR	AT1G74080	MYB122_FB	GCATGGACTCAAGAAGAAG	100
qPCR	AT1G74080	MYB122_RB	GTCAGGTCTTAAGTAATTCG	100
qPCR	AT2G38470	WRKY33_1F	GAAGCAAAGAGATGGAAAGG	99.4
qPCR	AT2G38470	WRKY33_1R	CTACGATTCTCGGCTCTC	99.4
qPCR	AT4G31500	83B1_1R	TCACGCCATATCTACCAGC	87.3
qPCR	AT4G31500	83B1_2F	TGGACGTCATGACTGGAC	87.3
qPCR	AT2G20610	SUR1_F	TGTAACACCTTGGTGGTCT	91.5
qPCR	AT2G20610	SUR1_R	CCTGTATTGACACTAGCAG	91.5
qPCR	AT4G39950	79B2_1R	GTAACTTCGGAGCATTCGT	95
qPCR	AT4G39950	79B2_2F	TCGCCGGATATCACATCC	95
qPCR	AT2G22330	79B3_1R	AGTCACTTCCGAACACTCA	92.8
qPCR	AT2G22330	79B3_2F	TCGCAGGTTACCATATTCC	92.8
qPCR	AT4G31970	82C2_L1	CAAGCATGTCCGTGTTTCTG	91.6
qPCR	AT4G31970	82C2_R1	GCATCTTCAGGGGATAACGA	91.6
qPCR	AT2G30750	71A12R	GATTATCACCTCGGTTCCT	93.1
qPCR	AT2G30750	71A12F	CCACTAATACTTCCCAGATTA	93.1
qPCR	AT2G30770	71A13F	GCTTCGGTTGCATCCTTCT	87.5
qPCR	AT2G30770	71A13R	ATTGATTATCACCTCTGTCC	87.5
qPCR	AT1G26380	FOX1_1F	ATGATGGATCGGATTCCGT	98.5
qPCR	AT1G26380	FOX1_2R	ACTCAGGTTACTCTCTGTG	98.5
qPCR	AT3G26830	PAD3_L1	ACGAGCATCTTAAGCCTGGA	78.4
qPCR	AT3G26830	PAD3_R1	TCGGTCATTCCCCATAGTGT	78.4
